# Supplementary material for: Hydrothermal Alteration at the San Vito Area of the Campi Flegrei Geothermal System in Italy: Mineral Review and Geochemical Modeling
Source: MDPI journal article supplement (doi:10.3390/min11080810), 2021-07-27
Supplement: s1 [file s1]

Archive with 3 entries (3 files):
- Figure S1.pdf
- Figure S2.pdf
- Table S1.xlsx
