# Supplementary material for: Hydrothermal Alteration at the San Vito Area of the Campi Flegrei Geothermal System in Italy: Mineral Review and Geochemical Modeling
Source: MDPI journal article supplement (doi:10.3390/min11080810), 2021-07-27
Supplement: s1 [file s1 › Figure S2.pdf]

**Figure S2.** EDS spectra and semi-quantitative composition of mineral phases in rock cores from the San Vito 1 well in the Campi Flegrei geothermal system.

Sample cored at 804. m.

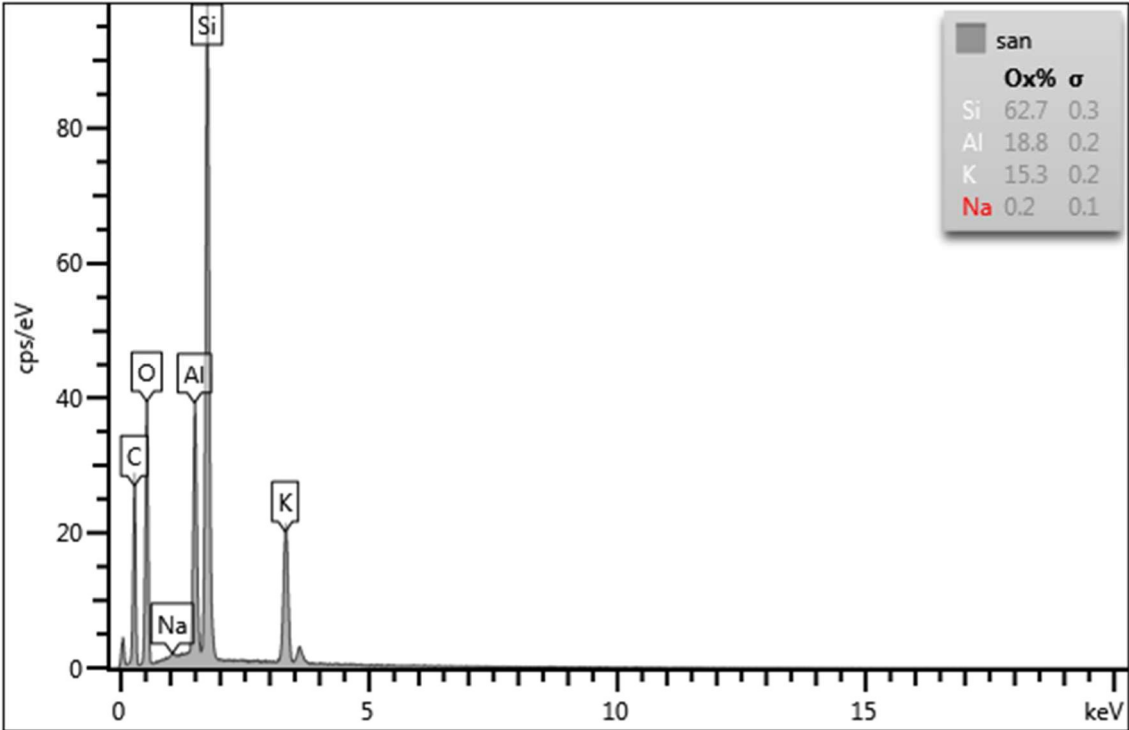

(a) Energy dispersive spectrum of a K-feldspar in sample cored at 804 m shown in Figure 5a.

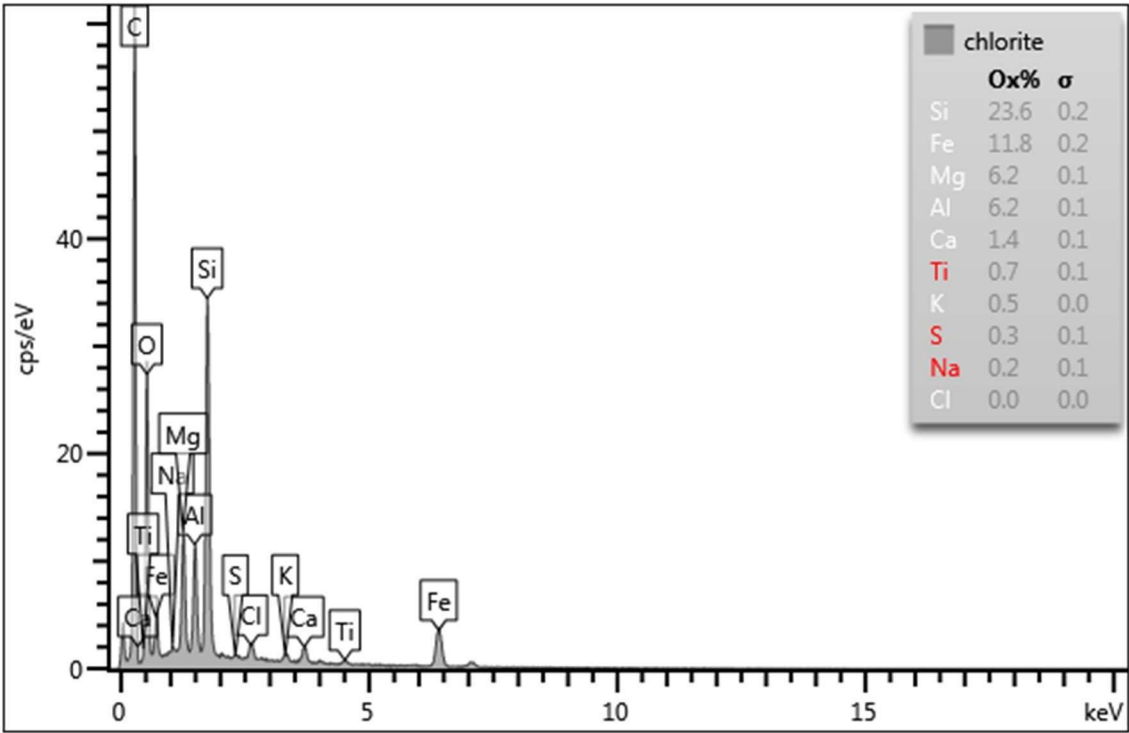

(b) Energy dispersive spectrum of the interlayered clays with chlorite-type nature in sample cored at 804 m shown in Figure 5a.

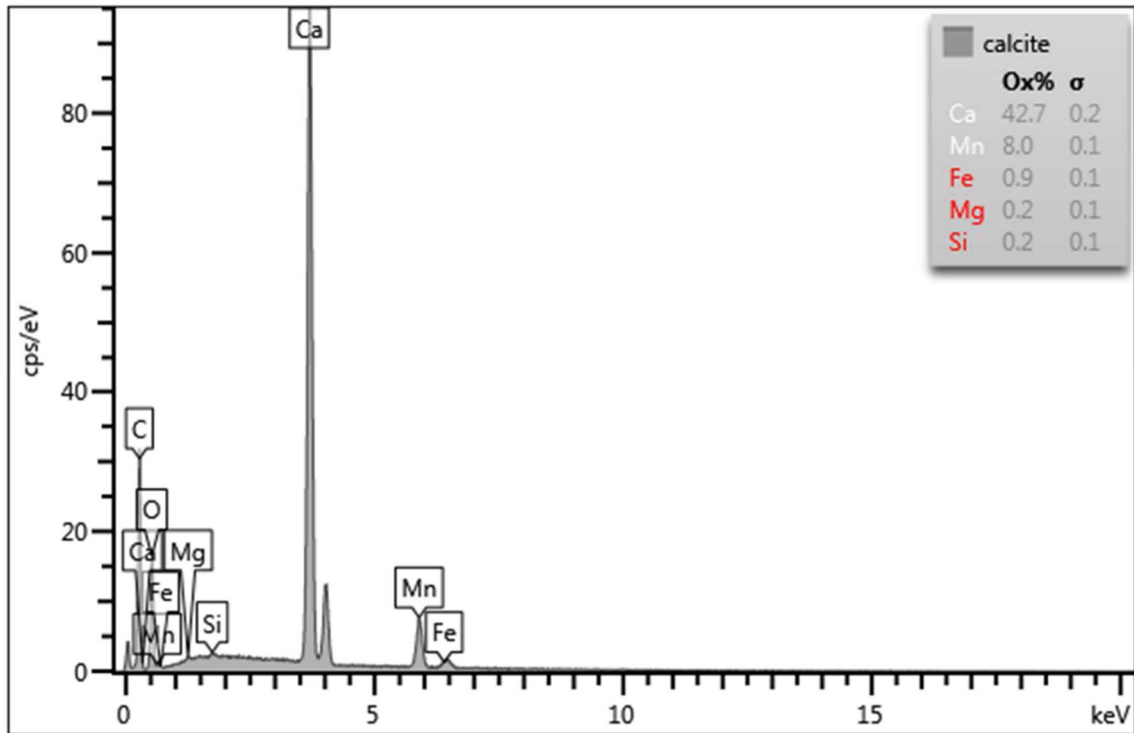

(c) Energy dispersive spectrum of a calcite in sample cored at 804 m shown in Figure 6a.

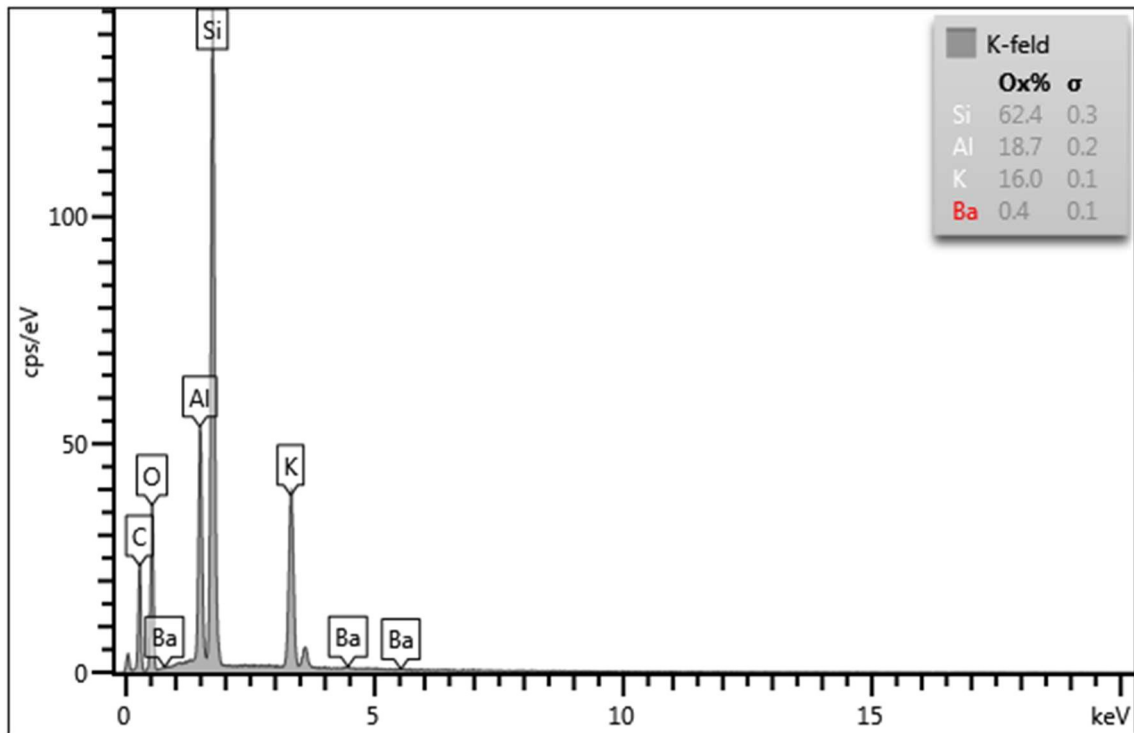

(d) Energy dispersive spectrum of a K-feldspar with Ba in sample cored at 804 m shown in Figure 6a.

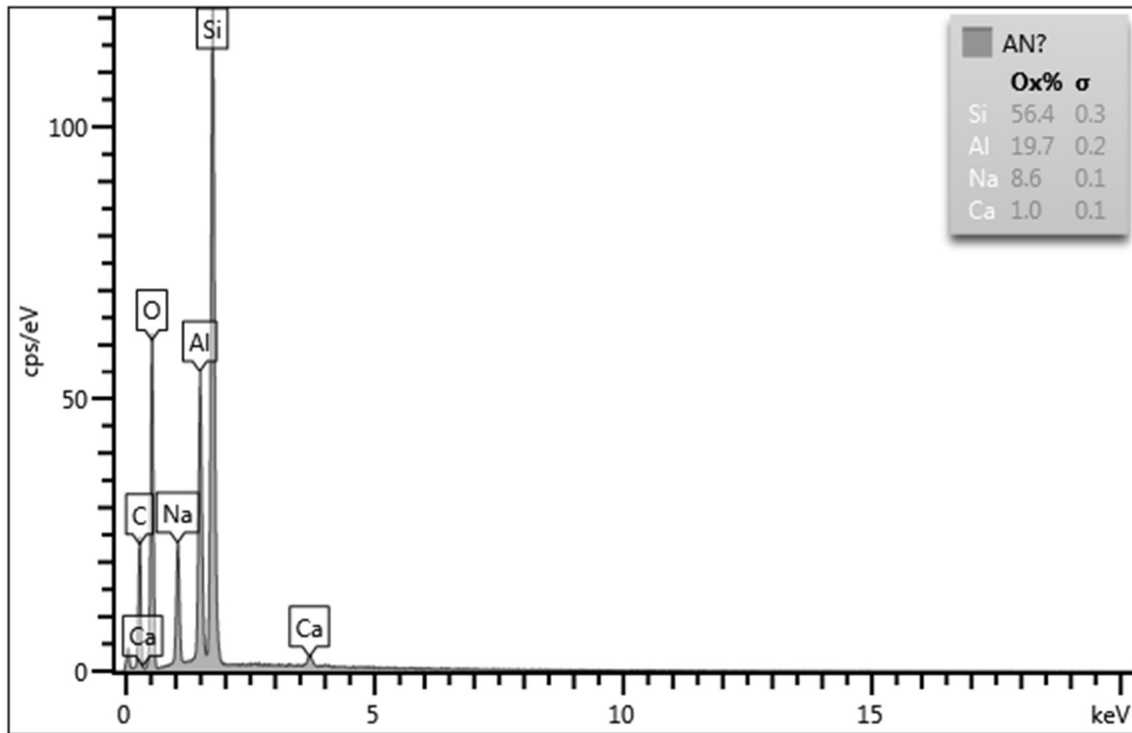

(e) Energy dispersive spectrum of an analcime in sample cored at 804 m shown in Figure 6a.

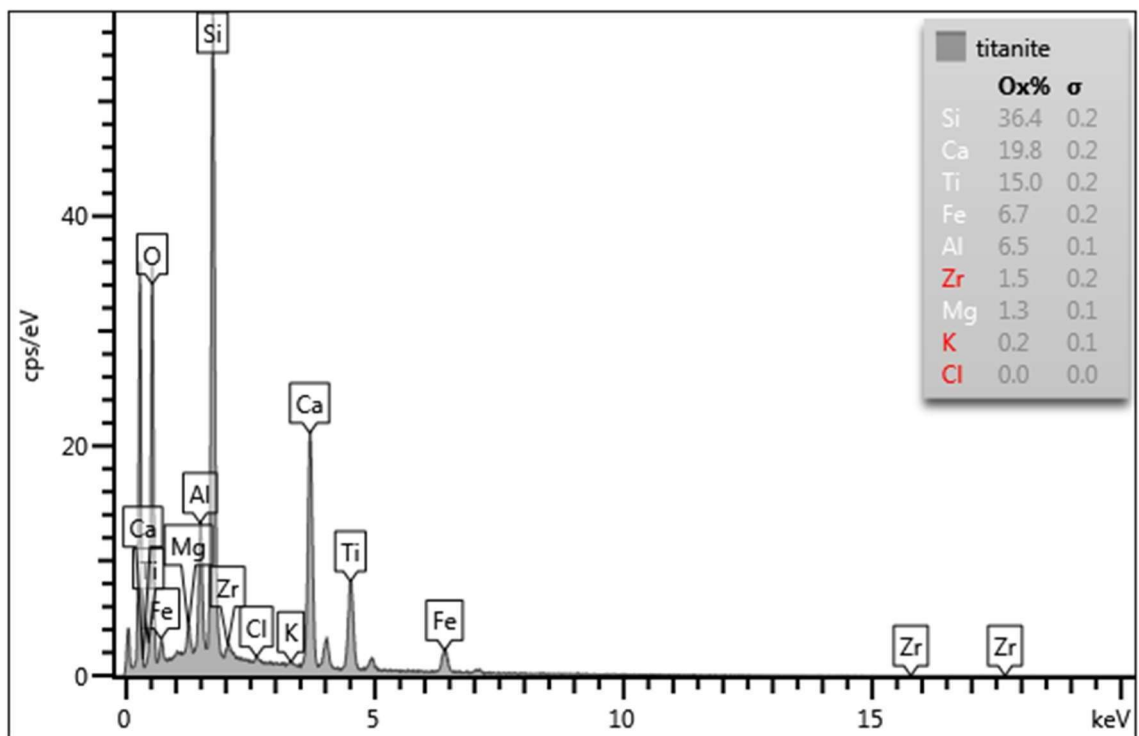

(f) Energy dispersive spectrum of a titanite in sample cored at 804 m shown in Figure 6b.

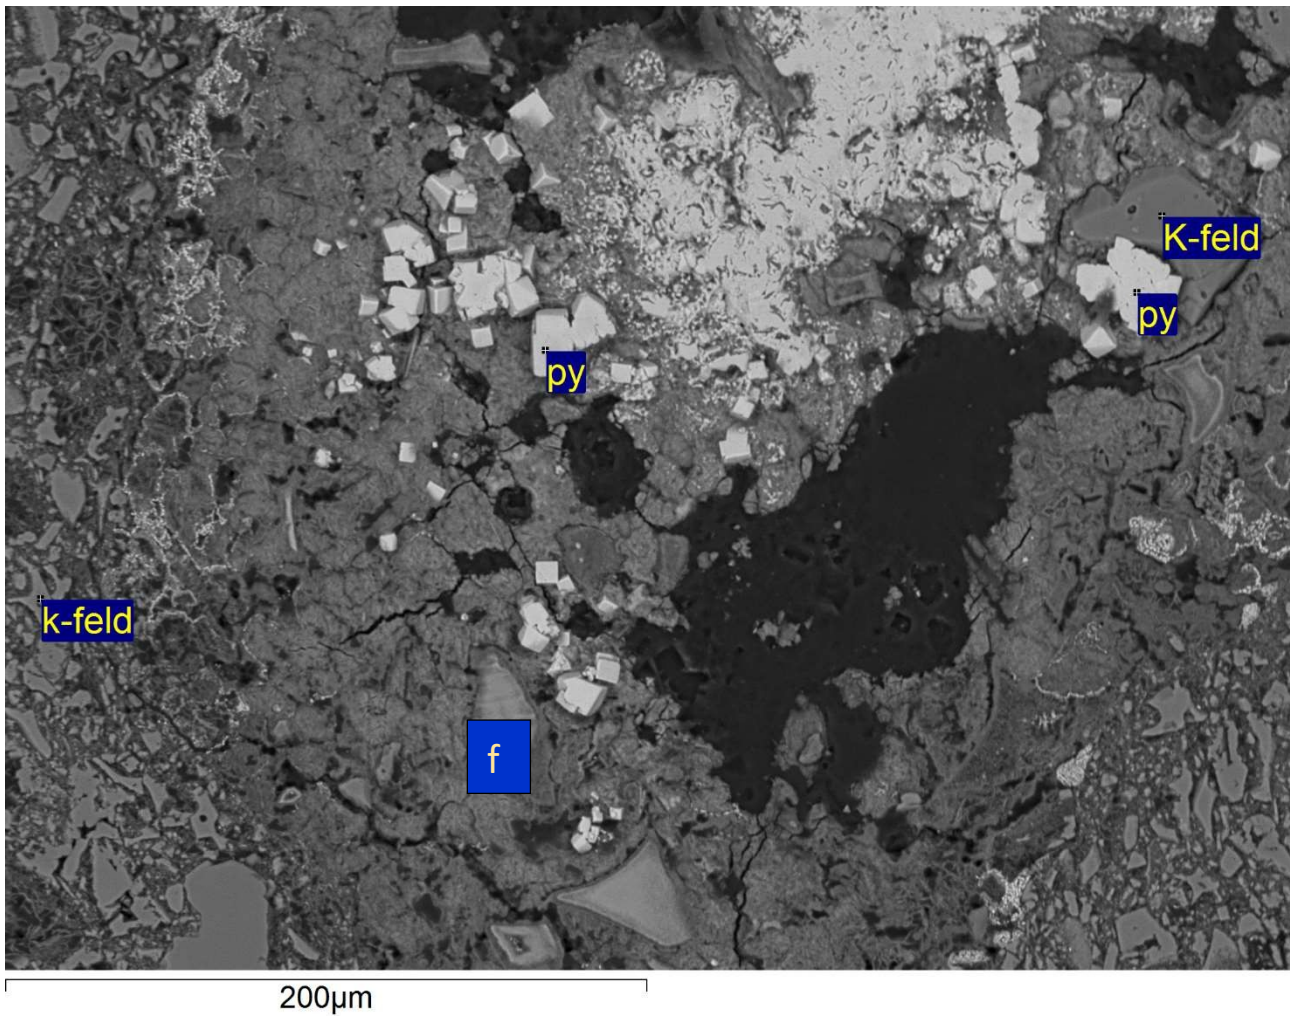

(g) Back scattered electron image of sample cored at 804 m showing a void fracture with cubic pyrites. K-feld, k-feldspar; py, pyrite; f, fossil.

Sample cored at 1412 m

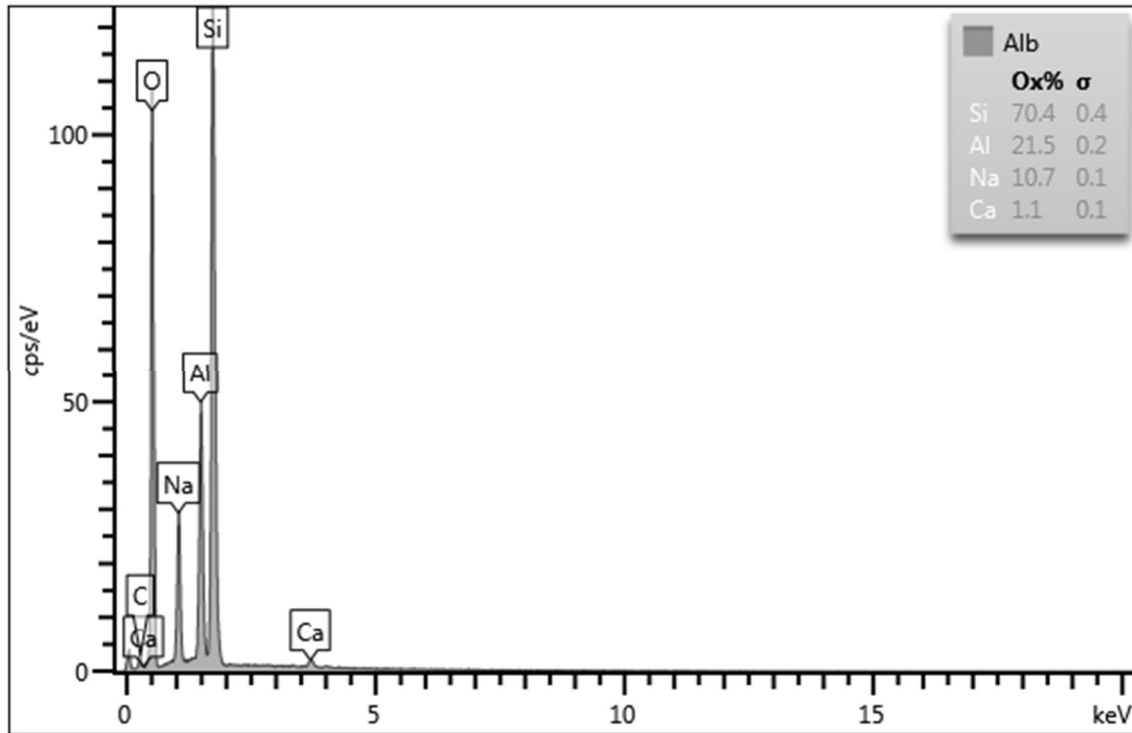

(h) Energy dispersive spectrum of an albite plagioclase in sample cored at 1412 m shown in Figure 5c.

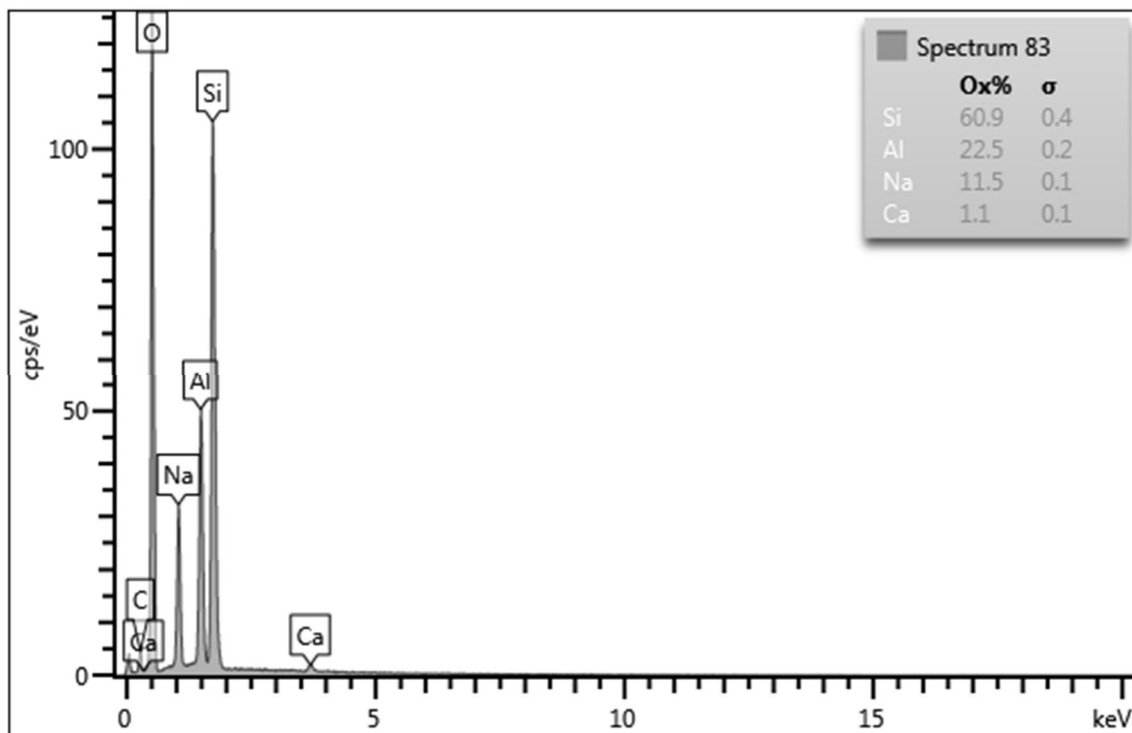

(i) Energy dispersive spectrum of an albite plagioclase in sample cored at 1412 m shown in Figure 5d.

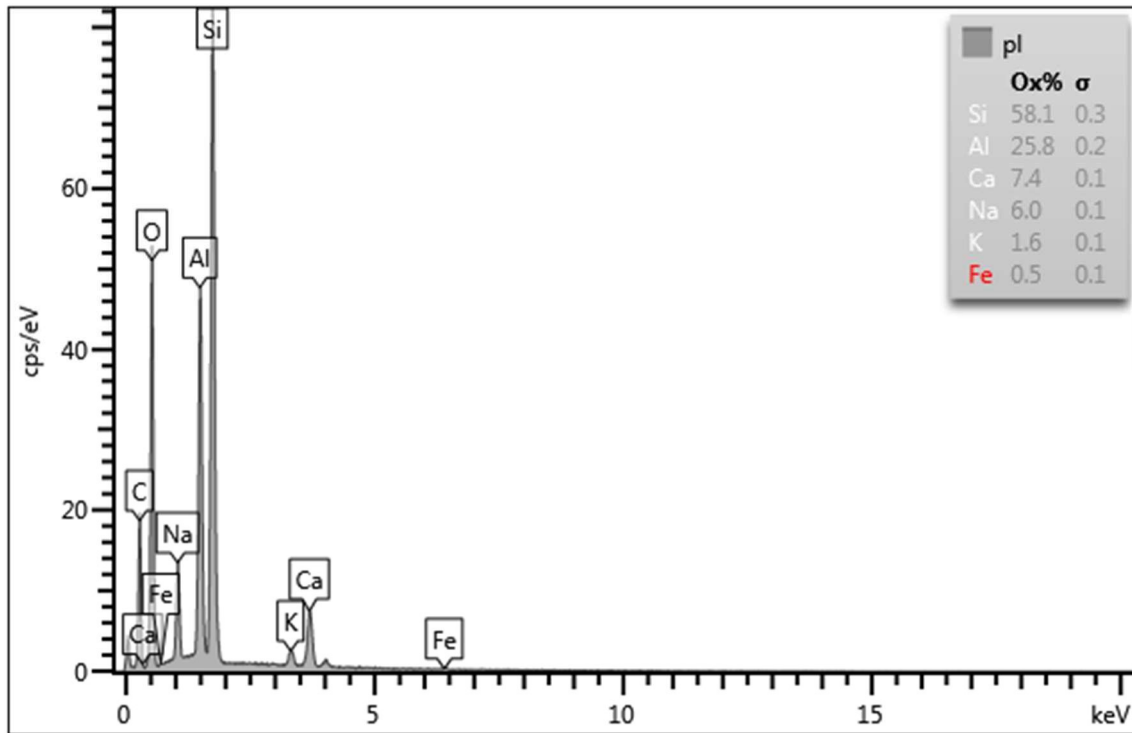

(j) Energy dispersive spectrum of an andesine plagioclase in sample cored at 1412 m shown in Figure 6e.

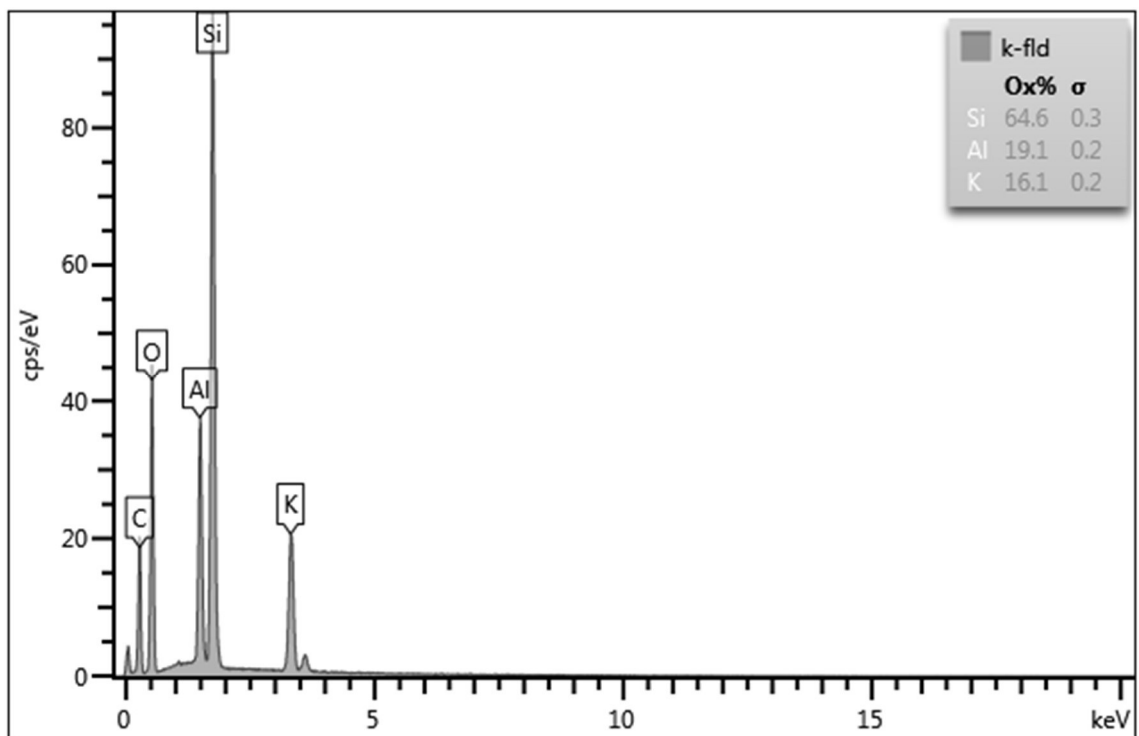

(k) Energy dispersive spectrum of a K-feldspar in sample cored at 1412 m shown in Figure 6e.

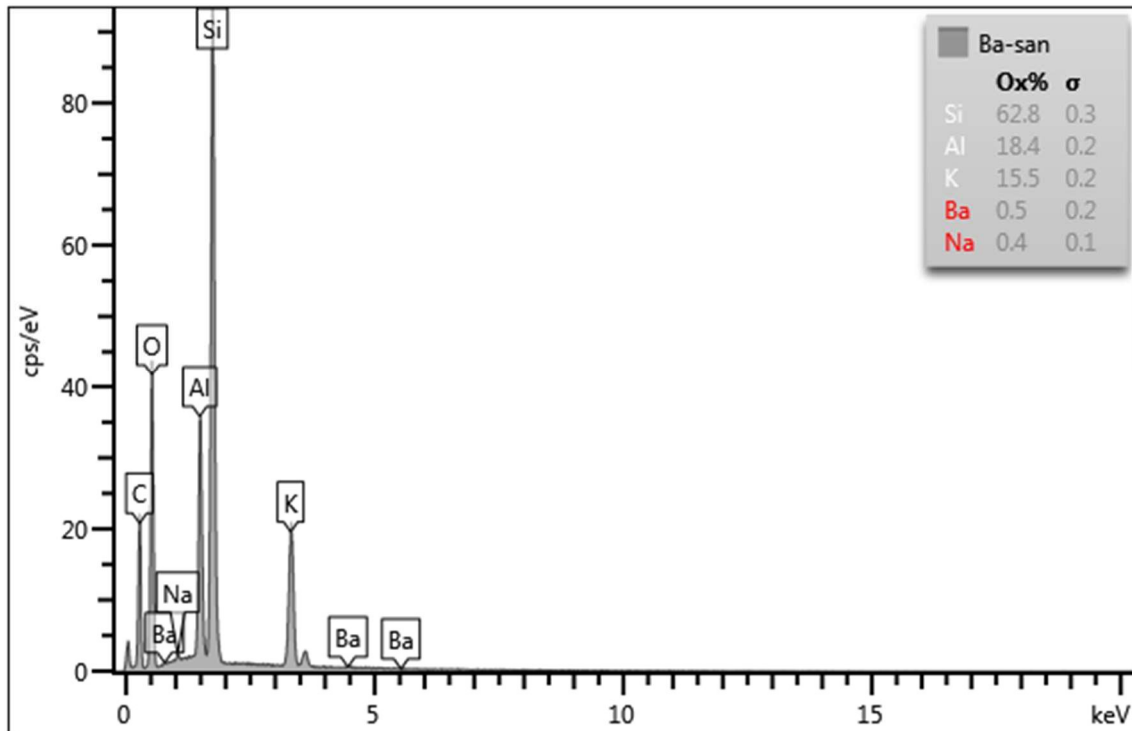

(l) Energy dispersive spectrum of a K-feldspar with Ba in sample cored at 1412 m shown in Figure 6e.

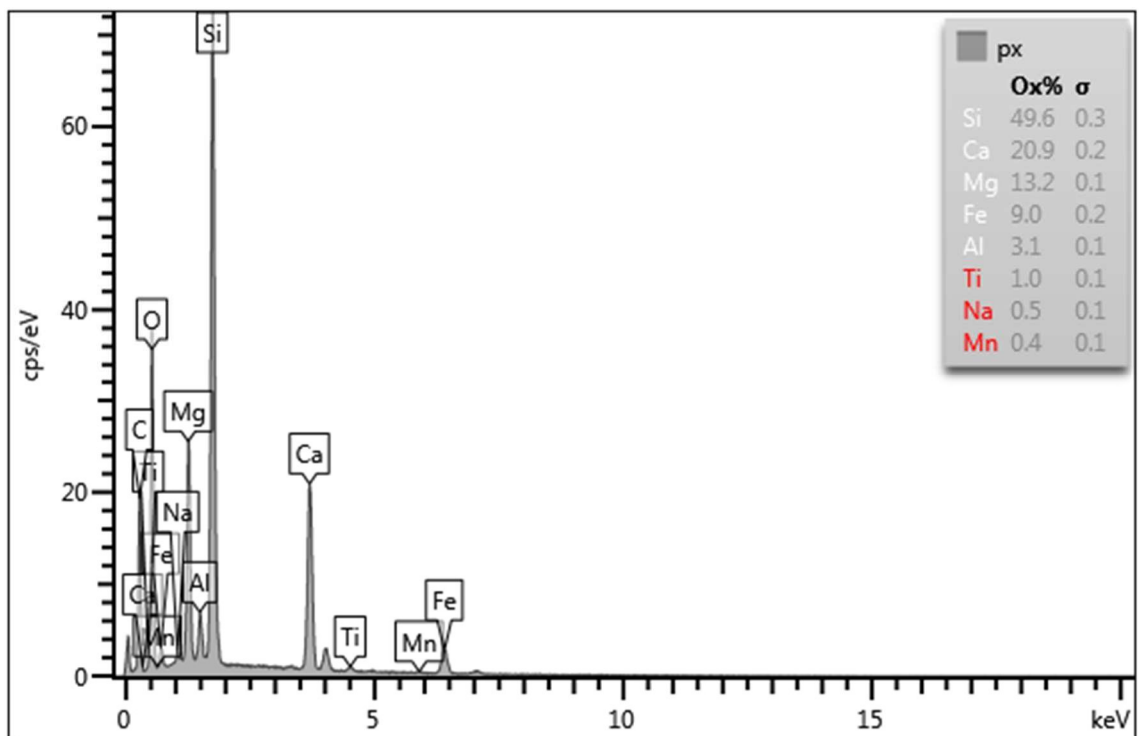

(m) Energy dispersive spectrum of a pyroxene in sample cored at 1412 m shown in Figure 6f.

Sample cored at 1713 m

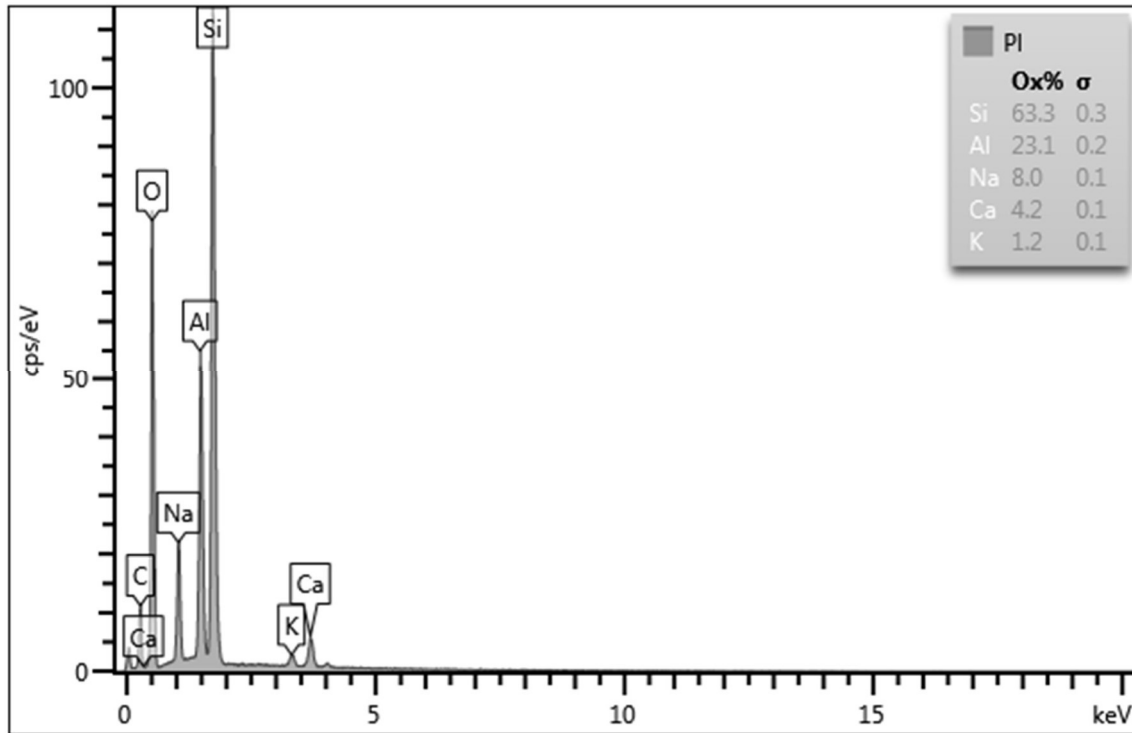

(n) Energy dispersive spectrum of an andesine plagioclase in sample cored at 1713 m shown in Figure 5e.

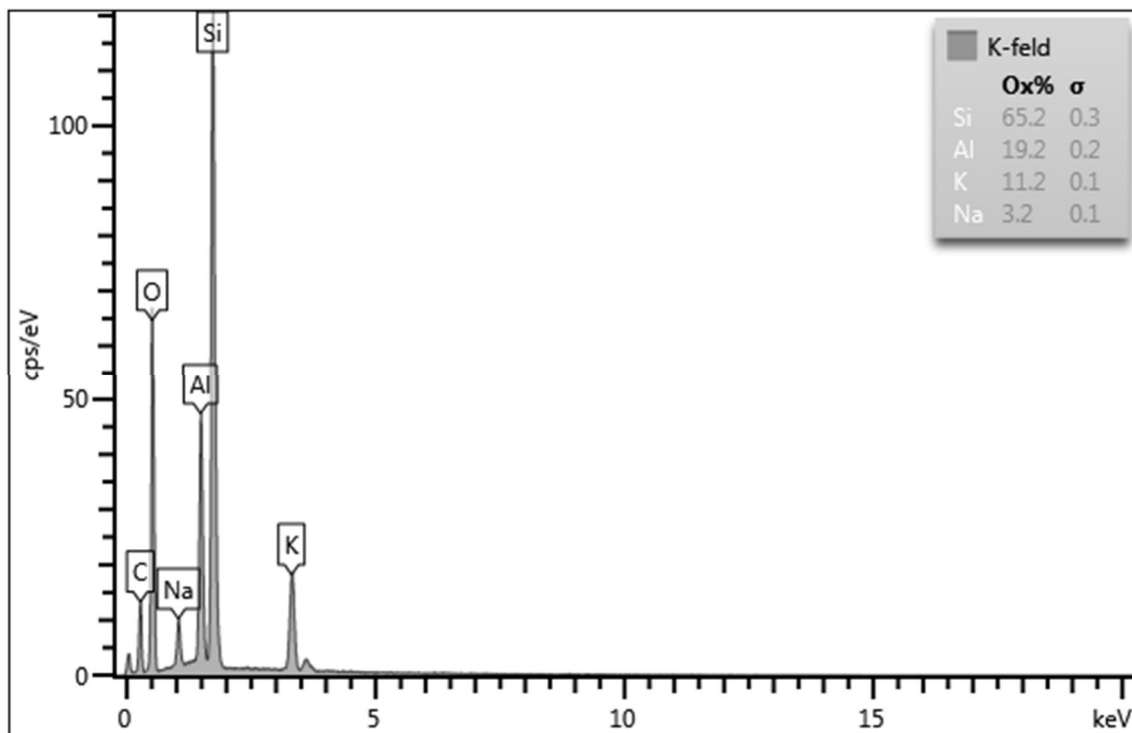

(o) Energy dispersive spectrum of a K-feldspar in sample cored at 1713 m shown in Figure 5e.

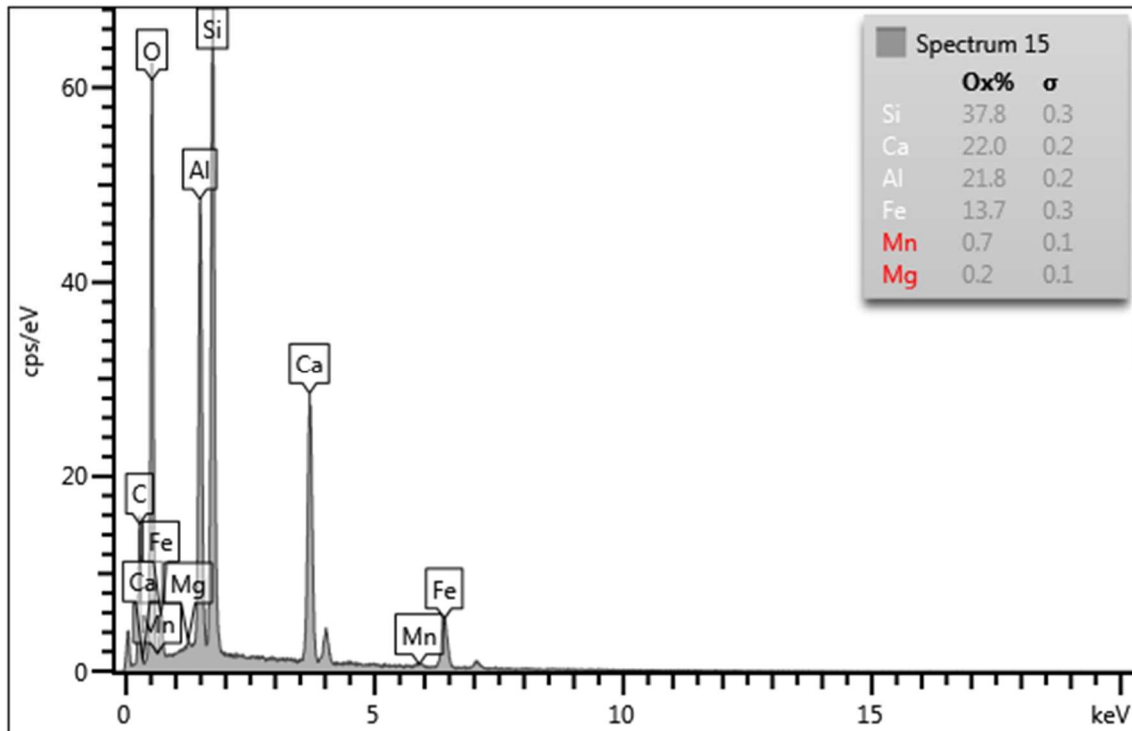

(p) Energy dispersive spectrum of a titanite in sample cored at 1713 m shown in Figure 5e.

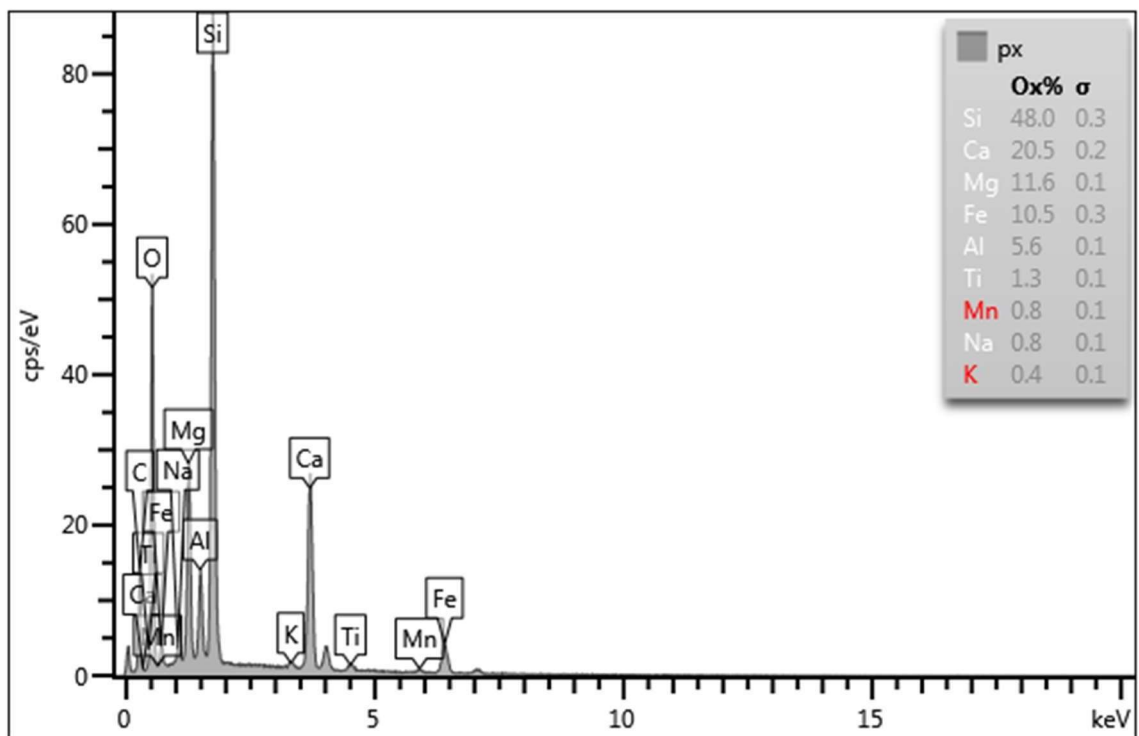

(q) Energy dispersive spectrum of a pyroxene in sample cored at 1713 m shown in Figure 6i.

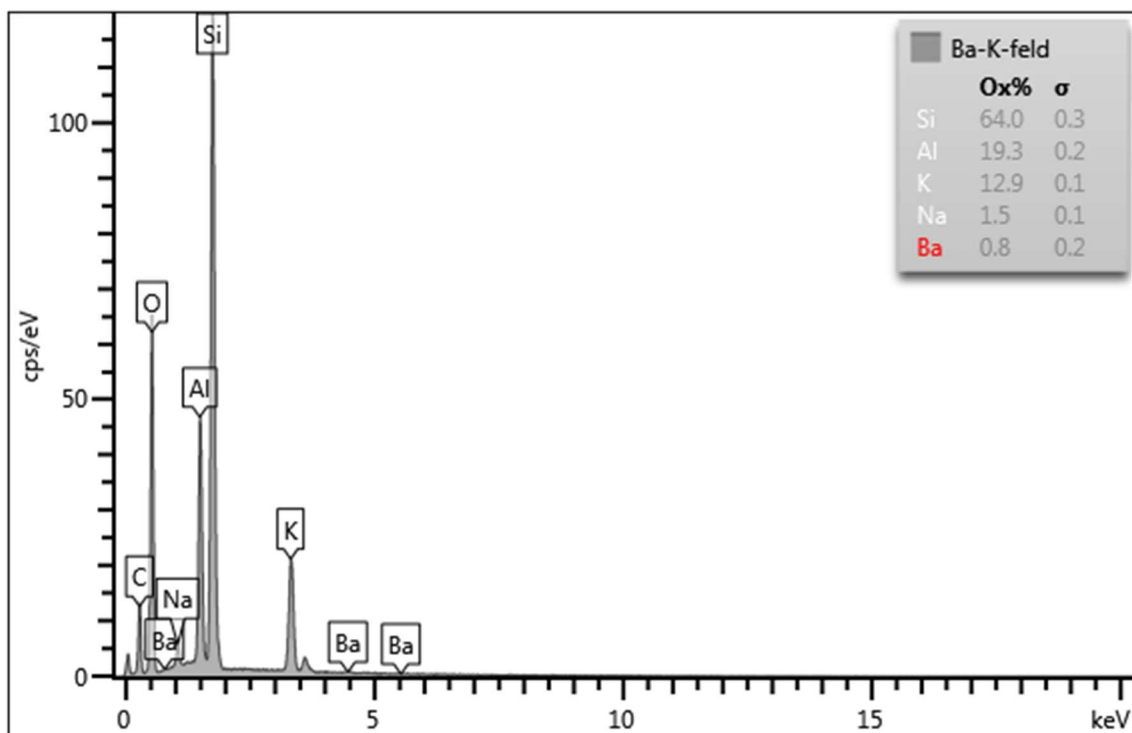

(r) Energy dispersive spectrum of a K-feldspar with Ba in sample cored at 1713 m shown in Figure 6i.

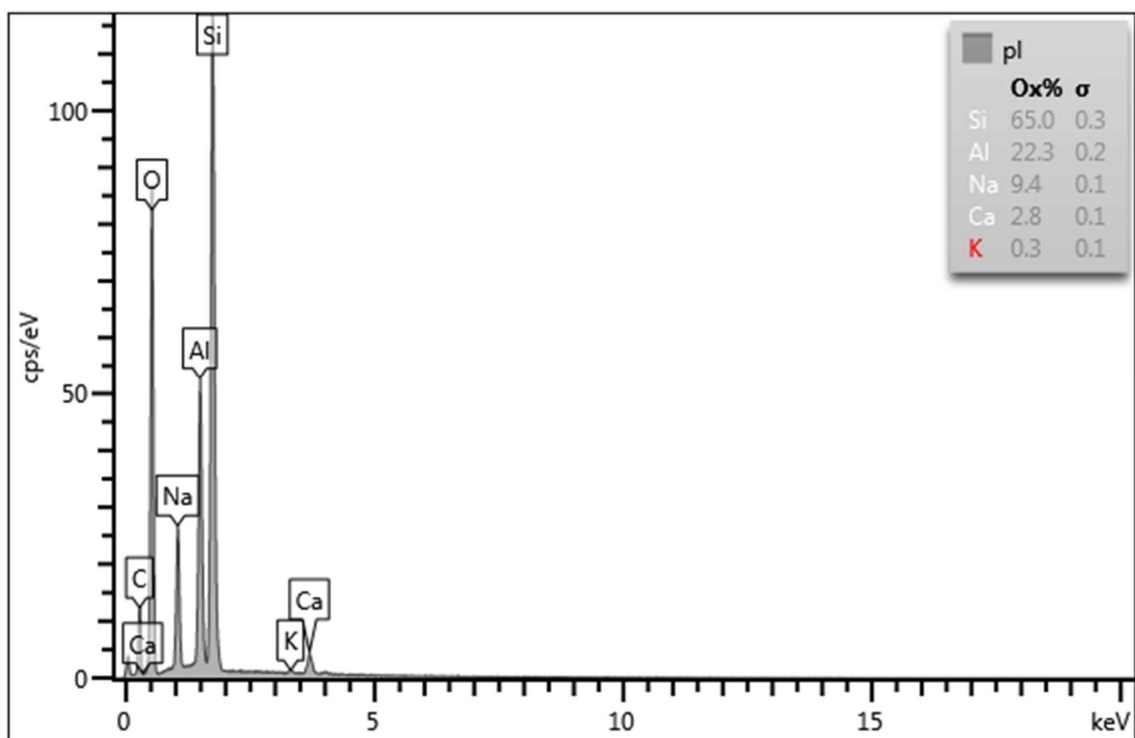

(s) Energy dispersive spectrum of an oligoclase plagioclase in sample cored at 1713 m shown in Figure 6i.

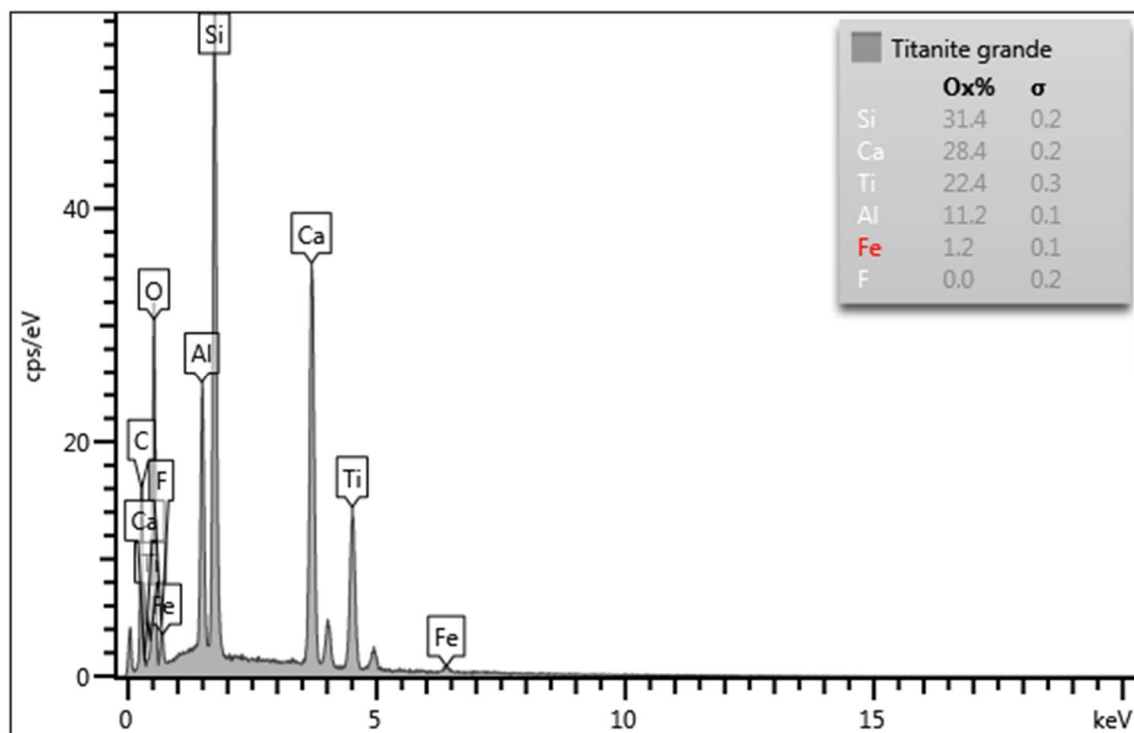

(t) Energy dispersive spectrum of a titanite in sample cored at 1713 m not shown in Figure.

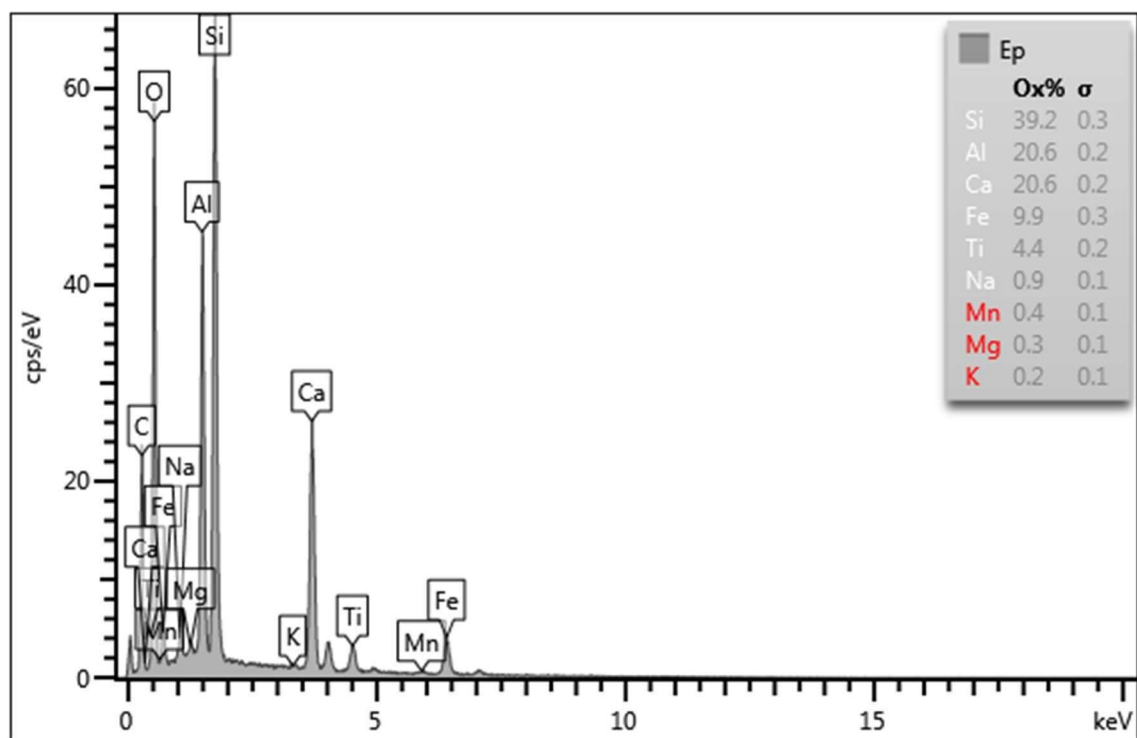

(u) Energy dispersive spectrum of an epidote in sample cored at 1713 m shown in Figure 6l.

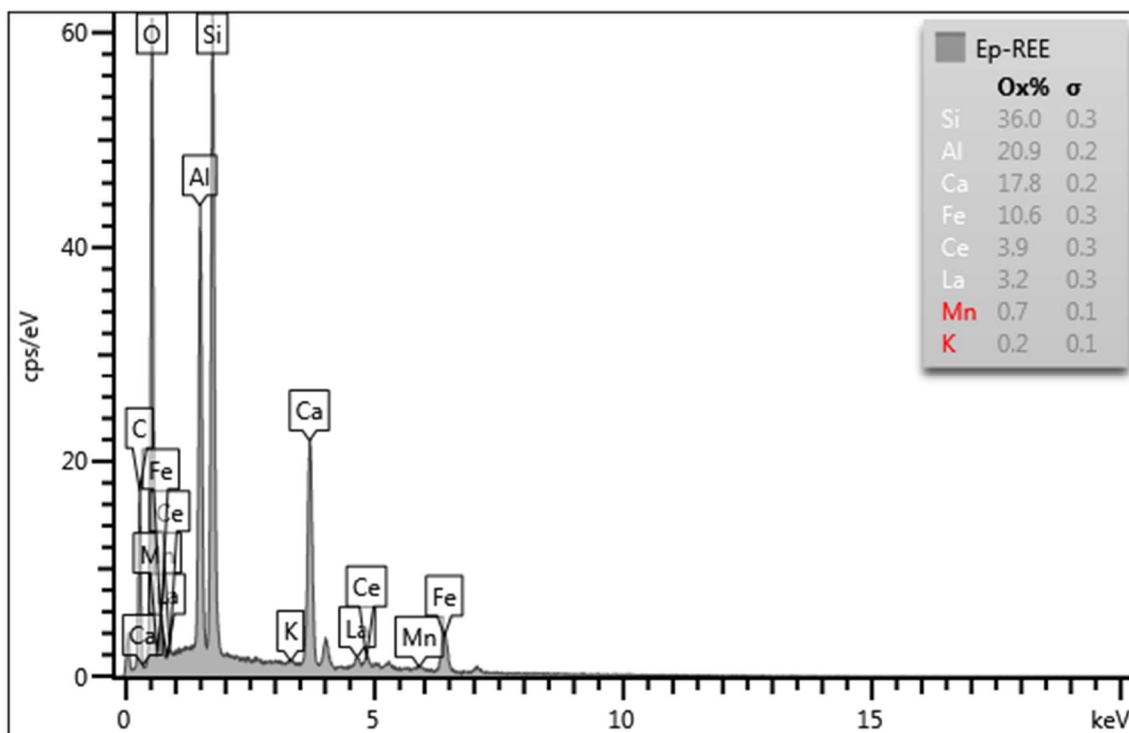

(v) Energy dispersive spectrum of a REE-bearing epidote in sample cored at 1713 m shown in Figure 6l.

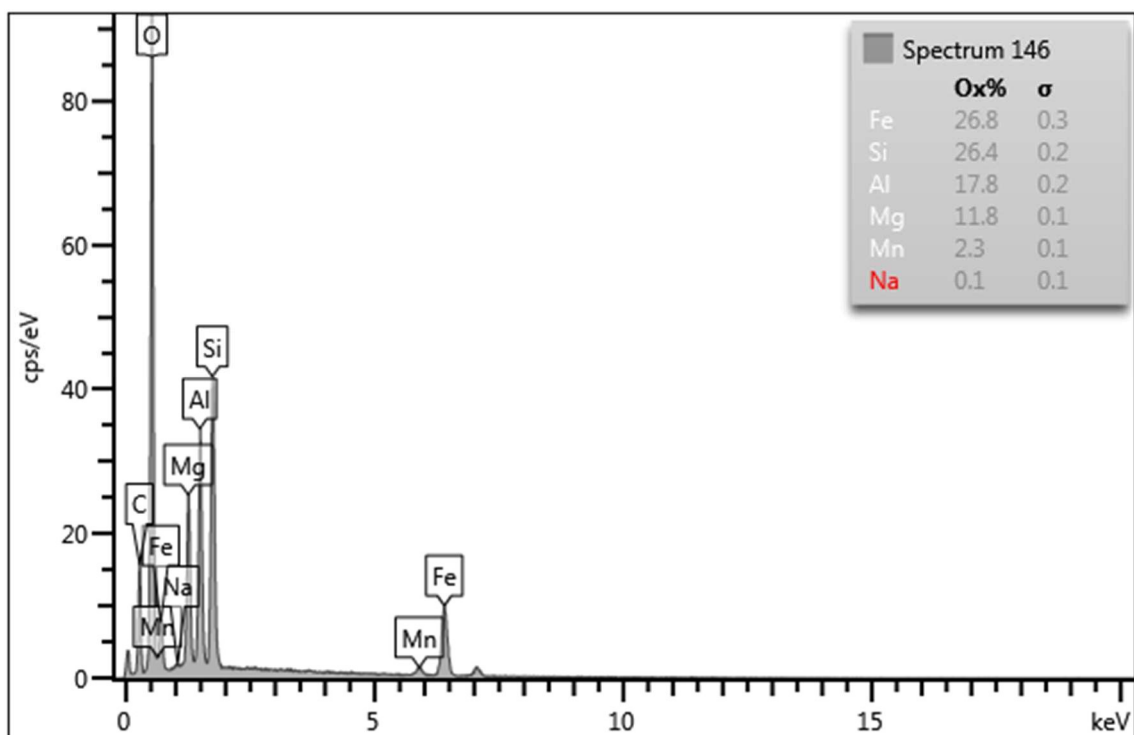

(w) Energy dispersive spectrum of a chlorite in sample cored at 1713 m.

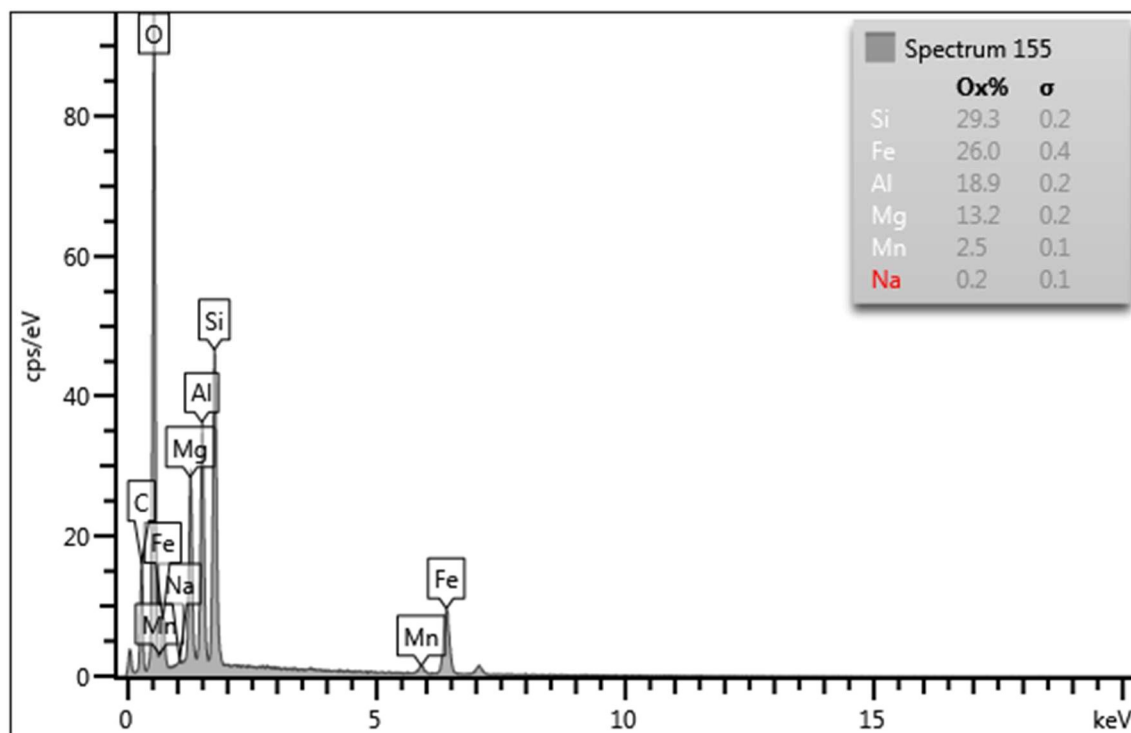

(x) Energy dispersive spectrum of a chlorite in sample cored at 1713 m.
