# Supplementary material for: Hydrothermal Alteration at the San Vito Area of the Campi Flegrei Geothermal System in Italy: Mineral Review and Geochemical Modeling
Source: MDPI journal article supplement (doi:10.3390/min11080810), 2021-07-27
Supplement: s1 [file s1 › Table S1.xlsx]

## Sheet: Petrophysics & minerals by AGIP
	Depth (m)	Lithology	Additional features	Cores (m)	Permeability (mD)	Porosity (%)	Density (g/cm3)	Temperature (°C)	Primary minerals (wt%)		ZE/AN	Secondary minerals (wt%)																Facies
									KF	PL		CC	QZ	IL	CL	PY	AN	AD	AB	EP	PH	SP	BT	AM	SC	GR	DI
	0-200	Tephra <14.9ka	Ashy-to-sandy tephra with pumices and rare lava clast		15.3-69.4*	37.7-39.24*	1.36-2.27*	25
	200-420	Pumiceous Tuff (Tp) and Chaotic Tuff of Neapolitan Yellow Tuff	Incoherent pumices and scoriae with rare lava clasts									tr			tr
	420-905		Ashy-to-sandy Yellow Tuff with pumices and rare lava clasts (Tg)	804	0.13–0.32	31.41-34.21 (27^)	2.48-2.68 - 2^	130	46-56	5-30	6-35	1-1.5	3.3-3.5	2.8-3	2.3-2.6		tr											Argillic
	905-975		Chaotic Tuff (Tc) - ashy to sandy						45	<5	20	<2.5	5	3-15	2.3-2.6		a											Phyllic - Chlorite-Illite
	975	Fossiliferous chaotic Tuffite (Tuc) belonging to the Campanian Ignimbrite with intercalated lavas and intrusions							45-40	5-10	20	<2.5	5	15-20	2.3-2.6
	1083-1087		Trachylatitic lava (L6-7)						45-40	5-10		<2.5	5	20-25	2.3-2.6
									45-40	5-10	20-15	<2.5	5	28	2.3-2.6		tr
	1185-1200		Latitic intrusion (M7)						40-30	5-10	15-20	5	5	28-15	2.3-2.6		tr
									30-15	5-10	20-30	5	10	15-3.5	2.3-2.6
	1312-1327		Latitic lava (L7)						30-15	5-10	35	5	10	3.5	2.3-2.6
				1412, 1417, 1418	0.09-29.11 (<1)	17.03-23.25	2.63–2.65 - 2.19^	260	30-40	10-20	20	5	10		2.3-2.6		tr
	1495-1502		Chaotic tuff (Tc)						30-40	10-20	10	5	10	3.5	2.3-2.6
									40-45	20	10-5	5	10-5	3.5	2.3-2.6
	1510-1520		Latitic lava (L7)						40-45	20	10-5	5	7	3.5	2.3-2.6					p
									40-45	20	10-5	5	7	3.5-12	2.3-2.6
	1555-1575		Trachylatitic lava (L6-7)						40-45	20	10-5	5	7	12-15	2.3-2.6		tr
									40-45	20	10-5	5	7	15-20	2.3-2.6		tr
	1595-1610		Chaotic tuff (Tc)						40-45	20	10-5	5	7	15-20	2.3-2.6													Propilitic - Calcium-aluminium silicate
									40-45	20	10-5	5	7	15-20	2.3-2.6					tr
	1662-1670		Latitic intrusion (M7)						40-45	20	10-5	5	7	15-20	2.3-2.6					tr
	1680-1695		Chaotic Tuff (Tc)						40-45	20	10-5	5	7	15-20	2.3-2.6		a			tr
	1695-1710		Latitic lava (L7)						40-45	20	10-5	5	7	25	2.6-5					p						tr
	1710-1760		Chaotic Tuff (Tc)	1713	0.42-11.36	20.3-35.52	2.65-2.69 - 2.24^	285	40-45	20	<2	5	7	25-20	2.6-5				tr	p
	1760-1765		Latitic lava (L7)						45-40	20-25	<2	5	7	25-20	2.6-5
	1765-1795	Generic Tuff (Tg)	Latitic tuff deposits (Tg7)						45-40	20-25	<2	5	7	20-10	2.6-5				p
	1795-1805		Latitic intrusion (M7)						45-40	20-25	<2	5	7	20-10	2.6-5		tr
	1805-1815		Chaotic Tuff (Tc)						45-40	20-25	<2	5	7	20-10	5-10
	1815-1820		Latitic intrusion (M7)						45-40	20-25	<2	5	7	20-10	5-10
	1820-1850		Chaotic Tuffite (Tuc)						45-40	20-25	<2	5	7	20-10	5-10
	1850-1860		Trachylatitic lava (L6-7)						45-40	20-25	<2	5	7	20-10	5-10				p	p
	1860-1905		Latitic tuff deposits (Tg7)						45-40	20-25	<2	5	7	7	5-10		tr
	1905-1924		Chaotic Tuff (Tc)						45-40	20-25	<2	5	7	5	10		tr
	1924-1935		Latitic intrusion (M7)						45-40	20-25	<2	5	7	5	10		tr
	1935-1998		Latitic tuff deposit (Tg7)						45-40	20-25	<2	5	10	5	10		tr
	1998-2015		Chaotic Tuff (Tc)						45-40	20-25	<2	5	10	5	10	tr	tr
	2015-2045		Latitic tuff deposit (Tg7)						30-40	25	<2	5	10	5	10	tr
	2045-2060		Latitic intrusion (M7)						30-40	25	<2	5	10	5	10	tr
	2060-2090		Latitic tuff deposit (Tg7)						30-40	25	<2	5	10	5	10	tr				tr
	2090-2154		Chaotic Tuff (Tc)	2130	0.24-9.4	15.52-26.04	2.64-2.71 - 2.32^	300	30-40	25	<2	5	10	5	10	tr		tr		tr	tr
	2154-2170		Trachy-latitic intrusion (M6-7)						30-40	25	<2	5	10	5-10	10			tr	tr	tr	p
	2170-2187		Latitic tuff deposit (Tg7)						30-40	25	<2	5	10	5-10	10			tr			p
	2187-2203		Trachy-latitic intrusion (M6-7)						30-40	25	<2	5	10	5-10	10		tr	tr			tr					p
	2203-2217		Trachy-latitic tuff deposit (Tg6-7)						30-40	25	<2	5	10	5-10	10		tr				tr					p
	2217-2223	Lava sequence	Trachy-latitic Lava (L6-7)						30-40	25	<2	5	10	10-20	10		tr			tr	tr
	2223-2227		Trachy-latitic tuff deposit (Tg6-7)						30-40	25	<2	5	10	10-20	10		tr				tr
	2227-2247		Trachy-latitic Lava (L6-7)						30-40	25	<2	5	10	10-20	10		tr				tr
	2247-2257		Trachy-latitic tuff deposit (Tg6-7)						30-40	25	<2	5	10	10-20	10		tr				tr
	2257-2262		Trachy-latitic Lava (L6-7)						30-40	25	<2	5	10	10-20	10		tr				tr
	2262-2272		Trachy-latitic tuff deposit (Tg6-7)						30-40	25	<2	5	10	10-20	10	tr	tr				tr
	2272-2310		Trachy-latitic Lava (L6-7)						30-40	25	<2	5	10	10-20	10	tr	tr	tr	tr		p		tr
	2310-2318		Latitic tuff deposit (Tg7)						30-40	25	<2	5	10	25	10		tr	tr			tr
	2318-2323		Latitic Lava (L7)						30-40	25	<2	5	10	25-20	10		tr	tr			tr
	2323-2327		Latitic tuff deposit (Tg7)						30-40	25	<2	5	10	25-20	10		tr	tr			tr
	2327-2333		Latitic intrusion (M7)						30-40	25	<2	5	10	25-20	10		tr	tr			tr
	2333-2367		Latitic tuff deposit (Tg7)						30-40	25	<2	5	10	25-20	10		tr	tr			tr					p
	2367-2378		Chaotic Tuff (Tc)						30-40	25	<2	5	10	25-20	10		tr	tr			tr
	2378-2389	Limestone (Ca)							30-40	25	<2	5	10	25-20	10			p			p	tr
	2389-2427	Tuffite sequence	Chaotic Tuffite (Tuc)						30-40	25	<2	5	10	25-20	10			tr	tr		tr	p
	2427-2438		Chaotic Tuff (Tc)						30-40	25	<2	5	10	25-20	10			tr	tr	tr	tr	tr		tr
	2438-2443		Trachy-latitic intrusion (M6-7)						30-40	25	<2	5	10	25-20	10	tr						tr		tr
	2443-2448		Chaotic Tuff (Tc)						30-40	25	<2	5	10	25-20	10	tr						tr		tr
	2448-2463		Latitic Tuff deposit (Tg)						30-40	25	<2	5	10	25-20	10	tr						tr		tr
	2463-2493		Chaotic Tuff (Tc)						30-40	25	<2	5	10	25-20	10	tr						tr		tr
	2493-2550		Chaotic Tuffite (Tuc)	2515	0.02-3.93 (<1)	4.82-14.16 (5^)	2.68-2.85 - 2.57^	335														a	p	tr		p
	2600-2837	Metadeposit	Volcanic-marly sands (Cgv Tc)	2683	0.02-22.32 (<10)	2.46-13.04 (<10)	2.62^	350										a					p	a	a	tr	tr	Thermo
	2837-3050		Possible Tuff (Tug)	2862, 2864	0.42-1	12.94-16.5	2.46^	390								tr		p					a	p	a		tr
	Data source: lithology from AGIP (1982)’s reports and Piochi et al (2016), permeability, porosity and density from Piochi et al (2016), Vanorio et al (2002) and Zamora et al (1994), Temperature from De Vivo et al (1989). Numbers: italic rare values; in parentheses more common values. ^low values from Zamora et al (1994), De Vivo et al (1989). *Gauro Tuff
	Abbreviation: KF, K-feldspar. PL, Plagioclase. ZE/AN, Zeolite/Analcime. CC, Calcite. QZ, Quartz. IL,Illite., CL, chlorite. PY, Pyrite. AN, Anhidrite. AD, Adularia. AB, Albite. EP, Epidote. PH, Pyrrhotine. SP, Stilopmelano. BT, Biotite. AM, Amphibole. SC, Scapolite. GR, Garnet. DI, Diopside.
	Note: logs parameters are minimum and maximum recoreved values
